# Supplementary material for: Potential Cross-Talk between Alternative and Classical NF-κB Pathways in Prostate Cancer Tissues as Measured by a Multi-Staining Immunofluorescence Co-Localization Assay
Source: PLoS One. 2015 Jul 17;10(7):e0131024. doi: 10.1371/journal.pone.0131024 (PMC4505937; doi:10.1371/journal.pone.0131024)
Supplement: S1 Table — (XLSX) [file pone.0131024.s003.xlsx]

## Sheet: Sheet1
ID	BCR status	timetoBCR	p65nucleartumor	RelnuclearBtumor	coredoublepositivenuclei	p65IHCstaining	p65-RelB-tissue	ratiop65-relB
1	0	88	45	5.816	0	0.8	4	2
2	0	147	1	2.562	0	5	0
3	0	90	45.2	23.361	1	3	4	1
4	1	138	21.4	60.824	1	7.5	4	0
5	1	51	4.9	1.901	0	10.5	0
6	0	88	5.7	4.991	0	57.5	4	1
7	0	137	49.9	45.807	1	12.5	4	1
8	0	153	11.7	51.8	0	4.5	4	0
10	0	119	42.7	70.488	1	4	4	1
11	0	167	26.2	37.528	1	6.5	4	1
12	0	143	14.8	7.832	0	6	4	1
13	1	54	43.3	3.678	0	0.3	1	2
14	1	11	58.2	16.192	1	0.3	4	2
15	0	52	15.6	10.786	0	5.3	4	1
16	0	81	51.7	20.986	1	0	4	2
17	1	6	28	10.99	0	6.3	4	2
19	1	12	2.7	14.906	0	6.3	2	0
21	0	47	27.6	7.54	0	0.5	4	2
22	0	147	19.8	14.579	0	14.3	4	1
24	0	177	59	42.575	1	13	4	1
25	1	83	39.5	16.996	1	6	4	2
26	0	52	1.2	2.887	0	4.8	0
28	1	20	20.8	40.322	1	23.8	4	1
30	0	144	0.3	1.329	0	1	0
31	0	67	7.4		0	6.5	0
32	0	14	63.8	49.846	1	6.3	4	1
33	0	79	0	7.673	0	7	2	0
34	1	6	5.2	3.671	0	0.5	0
36	1	31	16.9	17.623	0	15	4	1
37	0	121	18.6	9.109	0	8	4	1
38	1	10	13.1	1.195	0	0	1	2
39	0	14	12.5	13.078	0	13.8	4	1
40	0	47	3.5	13.359	0	3	2	0
41	0	31	2.6	4.693	0	0.5	0
42	0	86	13.5	3.773	0	4.8	1	2
43	1	5	38.7	58.235	1	3.5	4	1
44	1	92	5.8	4.984	0	12.8	4	1
45	0	60	54.4	7.325	0	0.5	4	2
46	1	72	33.5	9.946	0	0.5	4	2
47	0	28	24.5	37.769	1	0	4	1
48	0	114	49.8	14.815	1	4.5	4	2
49	0	59	11.6	14.22	0	16.8	4	1
50	0	100	8.7	2.781	0	10	0
52	0	117	16.4	3.025	0		1	2
53	0	107	7.4	3.153	0	5	0
54	0	150	19.5	5.493	0	3.8	4	2
55	0	30	34.1	7.589	0	9.5	4	2
56	1	19	11.3	2.004	0	3	1	2
57	0	103	3.7	2.079	0	2.5	0
58	1	65	8.6	26.654	0	2.5	4	0
59	1	24	51.8	22.045	1	8.8	4	2
60	0	79	14.2	4.374	0		1	2
61	1	71	4.4	0.847	0		0	2
63	0	71	20.6	23.546	1	4.5	4	1
64	0	82	57.6	39.448	1	0.8	4	1
65	0	74	37.7	12.341	0	2	4	2
66	0	16	4.6	6.347	0	15	2	1
67	0	116	13.5	10.549	0	6	4	1
68	1	19	37.5	89.931	1	2	4	0
69	0	70	10.5	8.716	0	0.5	4	1
70	0	73	17.7	10.144	0	4.5	4	1
71	0	96	4.9	1.314	0	33.8	0
72	0	95	23.5	4.545	0	2.8	1	2
73	1	4	23	4.561	0	8	1	2
74	0	123	2.8	4.659	0	2	0
75	0	67	18.1	1.626	0	13	1	2
76	0	85	6.4	2.496	0	7	0
77	0	94	16	9.467	0	9	4	1
78	0	96	37.4	20.454	0	0.8	4	1
79	1	4	10	0.323	0	1.5	1	2
80	0	64	17.5	23.849	1	0.5	4	1
81	0	115	7	10.141	0	1.5	4	1
82	1	9	1.9	10.136	0	0.5	2	0
83	1	23	41.4	1.252	0		1	2
84	0	114	5.1	8.787	0	31.7	4	1
86	1	4	22.6	6.936	0	18.3	4	2
87	0	58	21.5	6.868	0	12	4	2
88	0	109	32.7	47.754	1	13.8	4	1
89	0	172	29.2	7.347	0	0	4	2
90	1	12	24.2	24.318	1	12.5	4	1
91	0	107	3.6	9.698	0	3.3	2	0
92	0	72	9.2	6.013	0	3.3	4	1
93	0	89	8	31.801	0	18.8	4	0
94	0	68	31.2	45.01	1	1.5	4	1
95	0	192	5.3	1.78	0	2.7	0
96	0	130	15.5	18.877	0	2.5	4	1
97	0	43	54.3	54.99	1	20	4	1
98	0	155	38.1	22.947	1	5.3	4	1
99	1	87	24.3	47.619	1	9.3	4	1
100	0	98	13.1	2.584	0	0.3	1	2
1	0	168	31.9	2.292	0	9.5	1	2
2	0	87	18.1	10.267	0	1.5	4	1
3	0	113	61	5.216	0	7	4	2
4	0	126	40	6.378	0	15.3	4	2
5	0	137	46.8	47.902	1	0.5	4	1
6	0	150	6.1	13.081	0	12.5	4	0
7	0	152	6.5	7.27	0	0	4	1
8	0	140	6.2	14.747	0	2	4	0
10	0	85	37	47.662	1	5	4	1
11	0	140	57.3	69.107	1	32.5	4	1
12	0	130	35.6	17.349	0	0.3	4	1
13	1	31	43.1	42.089	1	0.8	4	1
14	0	125	32.5	10.915	0	15	4	2
15	1	37	15.9	4.863	0	13.8	1	2
16	0	14	26.3	65.672	1	4.3	4	0
17	1	25	13.8	6.471	0	0.8	4	2
18	0	203	7.9	28.27	0	12.5	4	0
19	1	129	33.8	19.649	1	12	4	1
20	0	8	0.6	5.329	0		2	0
21	1	89	68.9	15.557	1	9	4	2
22	0	7	0.8	2.89	0	0	0
23	1	28	11.7	2.918	0	0.5	1	2
24	0	76	23.4	6.117	0	50	4	2
25	0	51	1.6	9.1	0	12.5	2	0
26	1	108	9.3	15.253	0	3.5	4	1
27	1	15	7.4	17.205	0	1.5	4	0
28	1	23	1.2	3.921	0	13.8	0
29	1	16	20.9	14.312	0	32.5	4	1
30	0	104	6.2	2.449	0	1.8	1	2
31	1	55	36.5	15.961	1	3.5	4	2
32	0	57	68.3	22.518	1	4.3	4	2
33	1	3	27.3	7.896	0	0.5	1	2
34	0	145	5.9	6.367	0	12.5	4	1
35	0	62	29.7	30.949	1	12.5	4	1
36	1	31	9.8	2.098	0	31.8	1	2
37	0	65	3.3	0.926	0	0.5	0
38	0	171	19.2	2.778	0	0	1	2
39	0	145	29.4	12.016	0	3	4	2
40	0	66	2.3	2.004	0	3	0
41	0	59	3.2	8.298	0	0	2	0
42	0	71	17.9	37.873	1	2.3	4	0
43	0	42	11.3	4.212	0	2	1	2
44	0	152	34.5	11.519	0	0	4	2
45	1	126	20	8.02	0	0.5	4	2
46	0	62	10.1	5.277	0		4	1
47	1	11	51.4	4.305	0	3.3	1	2
48	1	4	26.5	7.278	0	0.3	4	2
49	1	19	8.4	7.494	0	0.5	2	1
50	0	76	17.1	7.661	0	0	4	2
51	0	55	25.8	17.739	0	1.5	4	1
52	1	55	14.1	75.451	1	0	4	0
53	1	9	45.6	69.152	1	1.3	4	1
54	1	8	21.5	4.183	0	3.5	1	2
55	0	82	4.2	4.221	0	0.8	0
56	1	3	13.1	31.404	0	5	4	0
57	0	100	3.2	2.991	0	1.5	0
58	0	68	38.9	7.191	0	1.8	4	2
59	0	45	26.9	9.887	0	2.5	4	2
60	0	61	15.3	8.297	0	2.3	4	1
61	0	56	22	50.53	1	3.3	4	0
62	0	79	7.2	9.467	0		4	1
63	0	79	1.4	0.39	0	1.5	0
64	1	3	21.5	1.913	0	0.3	1	2
65	0	44	15.3	14.343	0	0.3	4	1
66	0	79	19.4	17.649	0	3.3	4	1
67	0	48	7.2	5.604	0	1	4	1
68	0	73	62.9	55.854	1	2	4	1
69	0	2	37.9	58.469	1	0.8	4	1
70	0	121	14.8	36.159	0	0.5	4	0
71	0	44	1.4	7.274	0	2.8	2	0
72	1	9	59.2	12.5	1	5.3	4	2
73	0	115	1	3.756	0		0
74	1	22	38.8	22.893	1	1.3	4	1
75	0	56	27.9	6.512	0	12.8	4	2
76	0	102	25.7	6.752	0	1	4	2
77	0	104	17.5	16.081	0	1.5	4	1
78	0	118	16.7	8.312	0	4.8	4	1
79	0	129	27.7	4.922	0	9	4	2
80	0	44	18.3	19.622	1	0	4	1
81	1	4	48.1	9.777	0	2.3	1	2
82	0	75	9.2	6.511	0	22.5	4	1
83	0	125	1	6.334	0	5.5	2	0
84	0	123	31	4.648	0	13.8	1	2
85	0	10	18.1	94.578	1	0.3	4	0
86	0	83	0.4	4.01	0	30.8	0
87	0	27	12	12.168	0	1.5	4	1
88	0	172	50.3	35.994	1	0.8	4	1
89	0	140	37.5	6.52	0	1	4	2
90	0	101	5	3.982	0	1.5	0
91	0	50	29	50.84	1	10.8	4	1
92	0	76	2.4	18.23	0	3.8	2	0
93	1	7	27.2	85.541	1	0.5	4	0
94	0	64	8.3	18.069	0	0.5	4	0
95	0	176	6.2	23.936	0	1.3	4	0
96	1	19	18.1	1.658	0		1	2
97	0	193	27.2	9.353	0	2.5	4	2
98	0	198	56.2	42.633	1	27	4	1
99	1	3	22.1	34.415	1	5.3	4	1
100	0	155	2.7	0.649	0	16.3	0
